# Supplementary material for: Activity and durability of the oxygen reduction reaction in a nitrogen-doped rutile-shell on TiN-core nanocatalysts synthesised via solution-phase combustion
Source: Royal Society of Chemistry journal article supplement (doi:10.1039/c5ta08235h), 2015-12-01
Supplement: c5ta08235h1.pdf [file c5ta08235h1.pdf]

## Supplementary Information

# Activity and Durability of the Oxygen Reduction Reaction in a Nitrogen-Doped Rutile-Shell on TiN-Core Nanocatalysts Synthesised *via* Solution-Phase Combustion

*Mitsuharu Chisaka,<sup>a,\*</sup> Yuta Ando<sup>a</sup> and Noriaki Itagaki<sup>a</sup>*

<sup>a</sup> Department of Electronics and Information Technology, Hirosaki University,

3 Bunkyo-cho, Hirosaki, Aomori 036-8561, Japan.

\*Author to whom correspondence should be addressed.

Phone/Fax.: +81 172 39 3559, E-mail: [chisaka@hirosaki-u.ac.jp](mailto:chisaka@hirosaki-u.ac.jp) (M. Chisaka)

## S1. Surface crystal structure

Raman spectroscopy analyses were performed on some selected  $\text{TiO}_x\text{N}_y\text{-C}$  to investigate the surface crystal structures and oxygen defects in  $\text{TiO}_2$ . Figure S1 shows Raman spectra of  $\text{TiO}_x\text{N}_y\text{-C}$  with  $r = 100$  after pyrolysis at two different  $T$  values 1123 K and 1273 K for 2 h under  $\text{N}_2$  atmosphere. The typical Raman shifts for stoichiometric rutile- $\text{TiO}_2$  are  $\sim 142$ ,  $\sim 446$ , and  $\sim 608 \text{ cm}^{-1}$ , corresponding to the  $\text{B}_{1g}$ ,  $\text{E}_g$ , and  $\text{A}_{1g}$  modes, respectively.<sup>S1-S7</sup> A broad peak at  $\sim 250 \text{ cm}^{-1}$  was often observed for rutile  $\text{TiO}_2$  and was assigned to either second-order scattering or dynamic disorder of  $\text{TiO}_6$  octahedra.<sup>S3</sup> The Raman shifts for stoichiometric  $\text{TiN}$  are  $\sim 235$ , 320, 440, and  $570 \text{ cm}^{-1}$ , corresponding to transverse acoustic, longitudinal acoustic, second-order acoustic, and transverse optical modes, respectively.<sup>S8, S9</sup> Based on these assignments, the four peaks of the two  $\text{TiO}_x\text{N}_y\text{-C}$  shown in Fig. S1 are those of rutile  $\text{TiO}_2$ . Their XRD patterns showed different results; mixture of rutile  $\text{TiO}_2$  and  $\text{TiN}$  observed at 1123 K was completely converted to a single  $\text{TiN}$  phase at 1273 K due to the enhanced reactivity between  $\text{TiO}_2$  and urea or its by-products (Fig. 3). The different results observed from Raman spectroscopy against XRD should be originated from the lower depth in detection limit (the details are discussed in main body of the text) and the surface of  $\text{TiN}$  was oxidized to form rutile  $\text{TiO}_2$ . For the peak assigned to  $\text{E}_g$  mode in 1123 K sample, the Raman shift is lower than that of the stoichiometric rutile,  $\sim 446 \text{ cm}^{-1}$  and it slightly shifted to lower positions further when  $T$  was increased to 1273 K, suggesting that oxygen defects were incorporated into the surface rutile  $\text{TiO}_2$  of both samples and the amount of defects increased with increasing  $T$ .<sup>S7, S10</sup>

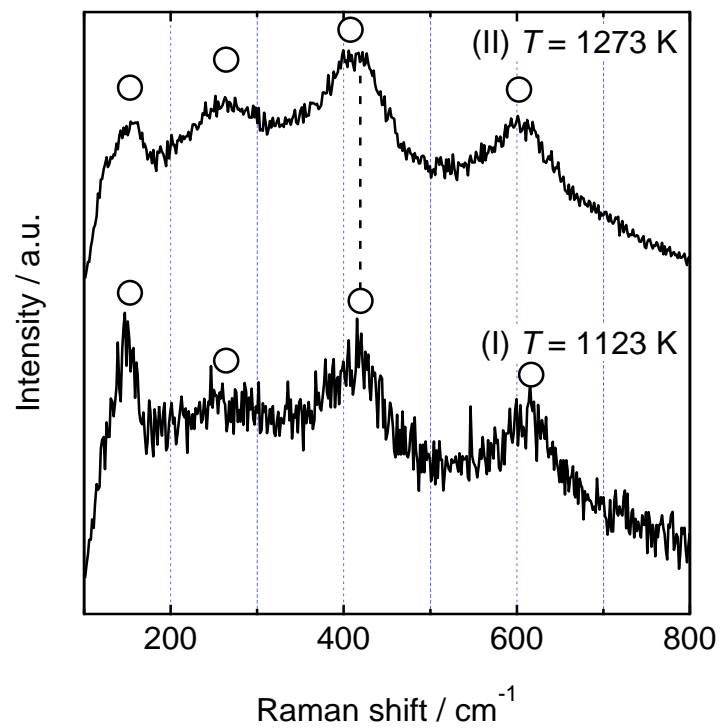

**Figure S1.** Raman spectra of  $\text{TiO}_x\text{N}_y\text{-C}$  with  $r = 100$  after pyrolysis at different  $T$  of (I) 1123 K and (II) 1273 K for 2 h under  $\text{N}_2$ .

## S2. Effect of $T$ on ORR activity and selectivity of $\text{TiO}_x\text{N}_y\text{-C}$

Pyrolysis temperature under  $\text{N}_2$  gas,  $T$ , was optimized for ORR activity and selectivity of  $\text{TiO}_x\text{N}_y\text{-C}$  with three different  $r$  values. Sets of RDE voltammograms and  $n-E_d$  curves of  $\text{TiO}_x\text{N}_y\text{-C}$  for  $r = 30$  and 100 are shown in Fig. S2 and S3, respectively. In both samples, the optimum  $T$  was 1173 K, 50 K higher than that of  $r = 188$  sample.<sup>S11</sup>

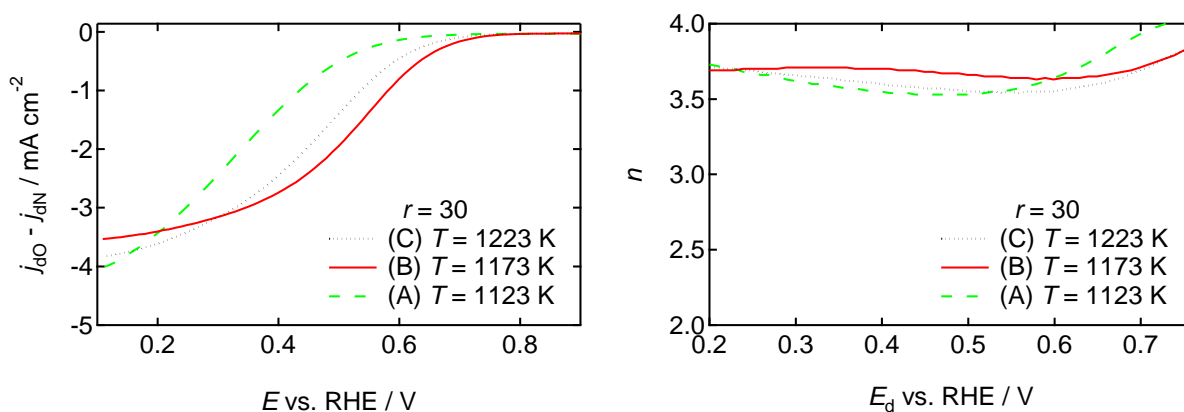

**Figure S2.** RDE voltammograms (left) and  $n-E_d$  curves (right) of  $\text{TiO}_x\text{N}_y\text{-C}$  for three different  $T$  of (A) 1123 K, (B) 1173 K and (C) 1223 K. The  $r$  was fixed at 30.

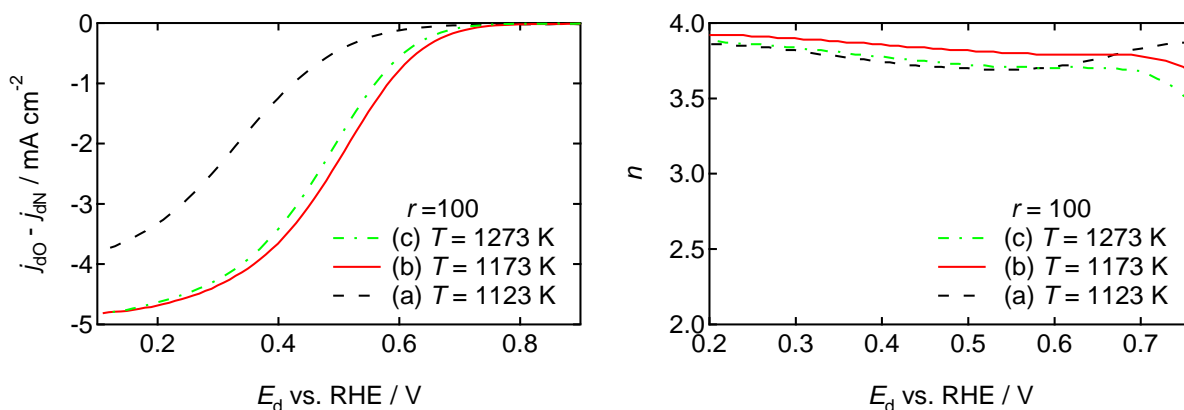

**Figure S3.** RDE voltammograms (left) and  $n-E_d$  curves (right) of  $\text{TiO}_x\text{N}_y\text{-C}$  for three different  $T$  of (a) 1123 K, (b) 1173 K and (c) 1273 K. The  $r$  was fixed at 100.

### S3. Effect of $t$ on crystal structure, chemical states and ORR activity of $\text{TiO}_x\text{N}_y\text{-C}$

The ORR activity was maximized by optimizing the  $r$  and  $T$  to 100 and 1173 K, respectively from Fig. 8 and S3. Effect of pyrolysis time,  $t$ , on some properties of  $\text{TiO}_x\text{N}_y\text{-C}$  was investigated at these conditions. Fig. S4, S5, S6 and S7 respectively shows XRD patterns, Ti 2p/N 1s spectra,  $s_2$ - $t$  curves and RDE voltammograms of  $\text{TiO}_x\text{N}_y\text{-C}$  for three different  $t$  values. The nearly single TiN phase was observed when  $t \leq 2$  h whereas rutile phase appeared at  $t = 4$  h, indicating that TiN was oxidized when  $t$  was increased from 2 h to 4 h. It is suggested that all the nitrogen-source, i.e., urea and its by-products reacted with  $\text{TiO}_2$  and therefore reductive atmosphere formed by the decomposition of nitrogen sources should be lost before  $t$  reached 4 h. Therefore, nitrogen atoms were lost at this high  $T$  of 1173 K. Their corresponding Ti 2p and N 1s spectra shown in Fig. S5 and the deconvolution results summarized in Fig. S6 agree well with these results; area fraction of Ti 2p peaks assigned to Ti-O-N/N-Ti-O bonding,  $s_2$  decreased by 0.1 and N 1s peak became noisy when  $t$  was increased from 2 h to 4 h. The resulting activity of 4 h sample was lower than that of 2 h sample as shown in Fig. S7, suggesting that some of active defect sites on rutile  $\text{TiO}_2$  created by nitrogen-doping were lost due to the removal of nitrogen atoms when  $t$  was increased from 2 h to 4 h.

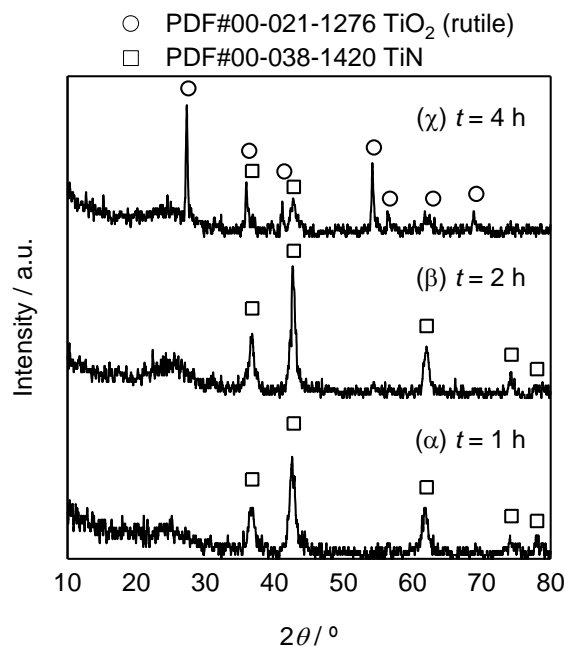

**Figure S4.** XRD patterns of  $\text{TiO}_x\text{N}_y\text{-C}$  after pyrolysis at  $T = 1173$  K for three different  $t$  of ( $\alpha$ ) 1 h, ( $\beta$ ) 2 h and ( $\gamma$ ) 4 h. The  $r$  was fixed at 100.

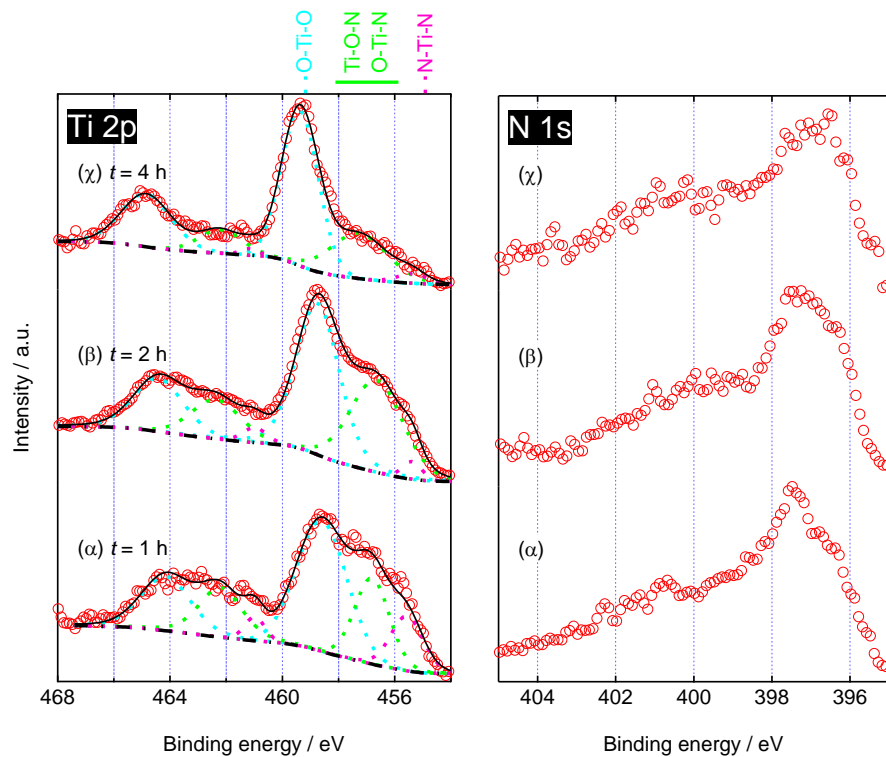

**Figure S5.** Ti 2p (left) and N 1s (right) spectra of  $\text{TiO}_x\text{N}_y\text{-C}$  after pyrolysis at  $T = 1173$  K for three different  $t$  values; ( $\alpha$ ) 1 h, ( $\beta$ ) 2 h and ( $\gamma$ ) 4 h. The  $r$  was fixed at 100.

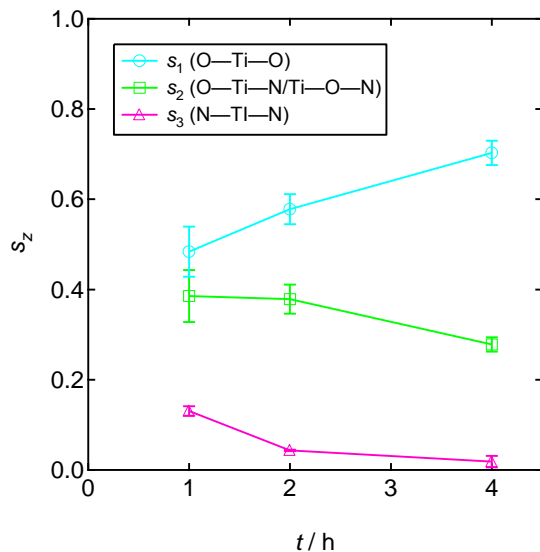

**Figure S6.** Area fractions of the three components shown in Fig. S5:  $s_1$  (O-Ti-O bonding),  $s_2$  (O-Ti-N/Ti-O-N bonding), and  $s_3$  (N-Ti-N bonding).

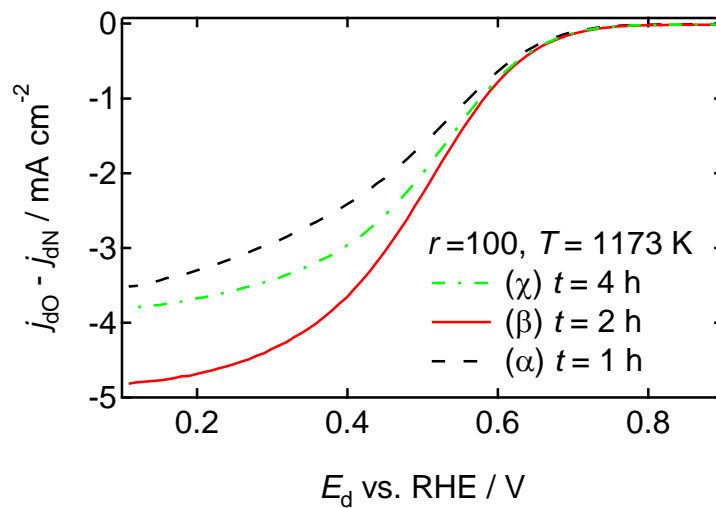

**Figure S7.** RDE voltammograms of  $\text{TiO}_x\text{N}_y\text{-C}$  after pyrolysis at  $T = 1173$  K for three different  $t$  values; ( $\alpha$ ) 1 h, ( $\beta$ ) 2 h and ( $\gamma$ ) 4 h. The  $r$  was fixed at 100.

#### S4. The ORR mechanism on $\text{TiO}_x\text{N}_y\text{-C}$

RRDE voltammograms of  $\text{TiO}_x\text{N}_y\text{-C}$  that showed the highest activity were obtained with various rotation speed,  $\omega$ , ranged from 400 rpm to 2500 rpm and are shown in Fig. S8. The disk current density after background correction,  $|j_{\text{dO}} - j_{\text{dN}}|$  was independent on  $\omega$  at  $E_{\text{d}} > 0.7$  V, indicating that ORR proceeded under kinetic control. The diffusion limitation became dominant as  $E_{\text{d}}$  decreased, which is evidenced by the increase of  $|j_{\text{dO}} - j_{\text{dN}}|$  with increasing  $\omega$ . To further investigate the ORR mechanism, Koutecky-Levich plots obtained from Fig. S8 are shown in Fig. S9. The ORR mechanism was analysed using a following equation for a planar electrode covered with Nafion film<sup>S12,S13</sup>

$$J_{\text{d}}^{-1} = J_{\text{k}}^{-1} + J_{\text{l}}^{-1} + J_{\text{f}}^{-1} \quad (\text{S1})$$

where  $J_{\text{d}} = -(J_{\text{dO}} - J_{\text{dN}})$ ,  $J_{\text{k}}$ ,  $J_{\text{l}} = B\omega^{1/2}$ , and  $J_{\text{f}}$  are the background-corrected disk current, kinetically controlled current,  $\text{O}_2$  diffusion limited current through the solution phase (B is the Levich constant), and  $\text{O}_2$  diffusion-limited current through the Nafion film, respectively. In all the plots,  $J_{\text{d}}^{-1}$  is linear with respect to  $\omega^{-1/2}$  and they are essentially parallel. The value of the intercept is expressed as  $J_{\text{k}}^{-1} + J_{\text{f}}^{-1}$  because the term  $J_{\text{l}}^{-1}$  should be zero at  $\omega \rightarrow \infty$ . The intercept decreased with decreasing  $E_{\text{d}}$  and it became negligible at  $E_{\text{d}} \leq 0.4$  V, indicating that both  $J_{\text{k}}^{-1}$  and  $J_{\text{f}}^{-1}$  are small and thus ORR proceeded under solution phase  $\text{O}_2$ -diffusion limited control at the  $E_{\text{d}}$  region. The Nafion film resistance,  $J_{\text{f}}^{-1}$  should be independent of  $E_{\text{d}}$ . Therefore, the values of  $J_{\text{f}}^{-1}$  at any  $E_{\text{d}}$  were assumed negligible to obtain  $J_{\text{k}}$ .

Accelerated degradation tests were performed using the best catalyst and Figure S10 shows the RDE voltammograms before and after 20,000 potential cycles in  $\text{O}_2$  atmosphere. Their  $J_{\text{k}}$  values were calculated as described above and resulting Tafel plots are shown in Fig. 10.



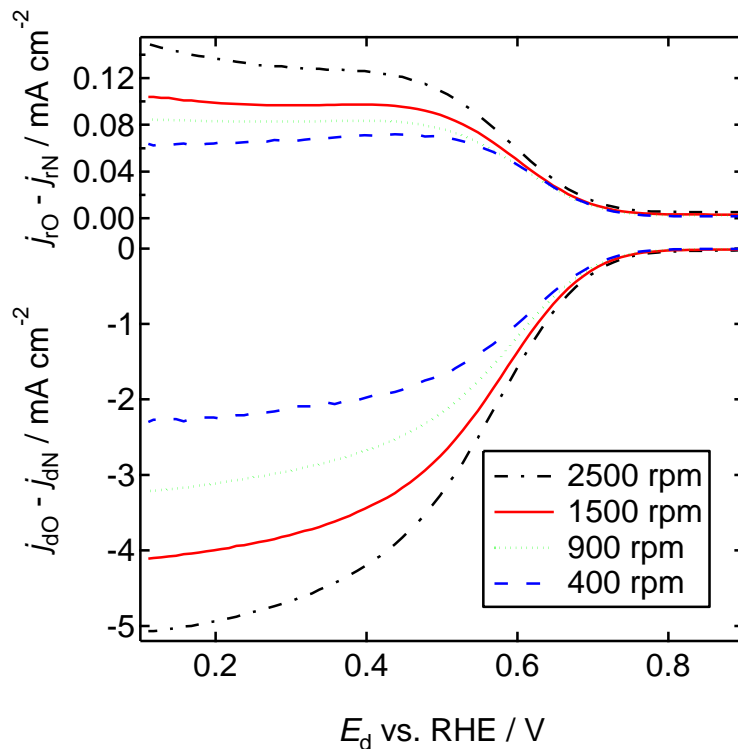

**Figure S8** RRDE voltammograms of  $\text{TiO}_x\text{N}_y\text{-C}$  for four  $\omega$ , 400, 900, 1500 and 2500 rpm. The  $r$ ,  $T$  and  $t$  were fixed at the optimum values of 100, 1173 K and 2 h, respectively.

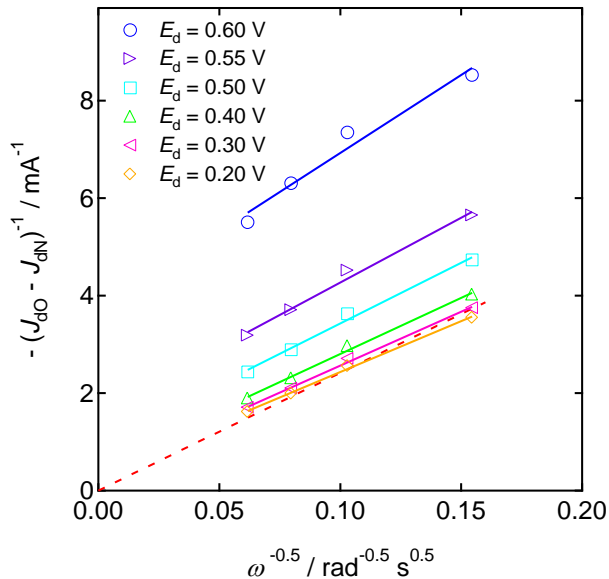

**Figure S9** Koutecky-Levich plots of  $\text{TiO}_x\text{N}_y\text{-C}$  obtained from Fig. S8 (Markers and solid lines) and an ideal planar electrode that catalyse ORR completely *via* a 4-electron reaction pathway without Nafion film calculated using a so-called Levich equation (dashed line).

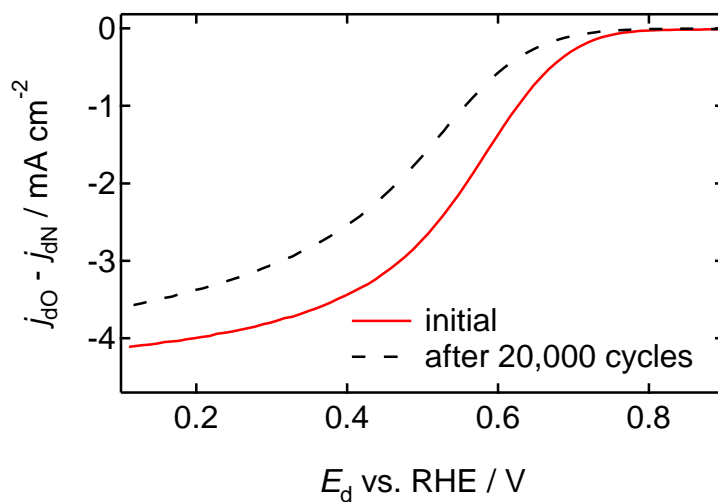

**Figure S10** RDE voltammograms of  $\text{TiO}_x\text{N}_y\text{-C}$  ( $r = 100$ ,  $T = 1173 \text{ K}$ ) before and after 20,000 potential cycles. Cycling was performed between 0.6 and 1.0 V vs. RHE at a scan rate of  $50 \text{ mV s}^{-1}$  in  $\text{O}_2$ -saturated  $0.1\text{-mol dm}^{-3} \text{ H}_2\text{SO}_4$ .

## S5. Active site for ORR on $\text{TiO}_x\text{N}_y\text{-C}$

To investigate the active site for ORR on  $\text{TiO}_x\text{N}_y\text{-C}$ ,  $\text{ZrO}_x\text{N}_y\text{-C}$  catalysts were synthesized by using  $\text{ZrF}_4$  (Sigma-Aldrich Co., St. Louis, Missouri, U.S.) instead of  $\text{TiF}_4$ . All the other experimental conditions used for  $\text{ZrO}_x\text{N}_y\text{-C}$  were identical to those for  $\text{TiO}_x\text{N}_y\text{-C}$  that showed the highest activity; the synthesis conditions were  $r = 100$ ,  $T = 1173$  K and  $t = 2$  h. The RDE voltammograms of  $\text{TiO}_x\text{N}_y\text{-C}$  and  $\text{ZrO}_x\text{N}_y\text{-C}$  are shown in Fig. S11. The  $\text{TiO}_x\text{N}_y\text{-C}$  showed higher  $|j_{\text{dO}} - j_{\text{dN}}|$  than  $\text{ZrO}_x\text{N}_y\text{-C}$  at any  $E_{\text{d}}$ , indicating that the oxynitride particles determined the activity of these catalysts. If the activity of these two catalysts were originated from nitrogen-doped carbon species, these two voltammograms should be identical because all the following parameters were identical; the content of carbon supports, urea and pyrolysis conditions. Therefore, these results indicate that the activity of  $\text{TiO}_x\text{N}_y\text{-C}$  was, at least at high  $E_{\text{d}}$ , originated from  $\text{TiO}_x\text{N}_y$ , not from nitrogen-doped carbon species.

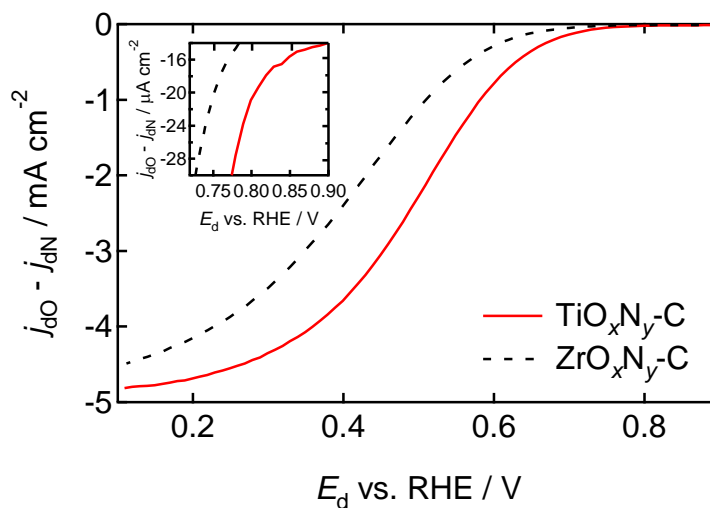

**Figure S11.** RDE voltammograms of  $\text{TiO}_x\text{N}_y\text{-C}$  and  $\text{ZrO}_x\text{N}_y\text{-C}$  after pyrolysis at  $T = 1173$  K for 2 h under  $\text{N}_2$  atmosphere. The  $r$  was fixed at 100.

## References

- (S1) S. P. S. Porto, P. A. Fleury and T. C. Damen, *Phys. Rev.*, 1967, **154**, 522.
- (S2) R. J. Capwell, F. Spagnolo and M. A. DeSesa, *Appl. Spectrosc.*, 1972, **26**, 537.
- (S3) U. Balachandran and N. G. Eror, *J. Solid State Chem.*, 1982, **42**, 276.
- (S4) R. J. Betsch, H. L. Park and W. B. White, *Mat. Res. Bull.*, 1991, **26**, 613.
- (S5) H. Cheng, J. Ma, Z. Zhao and L. Qi, *Chem. Mater.*, 1995, **7**, 663.
- (S6) S. M. Oh, J. G. Li and T. Ishigaki, *J. Mater. Res.*, 20 (2005) 529
- (S7) X. H. Wang, J. G. Li, H. Kamiyama, M. Katada, N. Ohashi, Y. Moriyoshi and T. Ishigaki, *J. Am. Chem. Soc.*, 2005, **127**, 10982.
- (S8) Y. H. Cheng, B. K. Tay, S. P. Lau, H. Kupfer and F. Richter, *J. Appl. Phys.*, 2002, **92**, 1845.
- (S9) W. Spengler, R. Kaiser, A. N. Christensen and G. Müller-Vogt, *Phys. Rev. B*, 1978, **17**, 1095.
- (S10) M. Chisaka, A. Ishihara, K. Suito, K. Ota and H. Muramoto, *Electrochim. Acta*, 2013, **88**, 697.
- (S11) M. Chisaka, Y. Ando and H. Muramoto, *Electrochim. Acta*, 2015, **183**, 100.
- (S12) U. A. Paulus, T. J. Schmidt, H. A. Gasteiger and R. J. Behm, *J. Electroanal. Chem.*, 2001, **495**, 134.
- (S13) E. Higuchi, H. Uchida and M. Watanabe, *J. Electroanal. Chem.*, 2005, **583**, 69.
